# Supplementary material
Source: PubMed Central journal article supplement (PMC524386)
Supplement: 7600406s1.pdf [file 7600406s1.pdf]

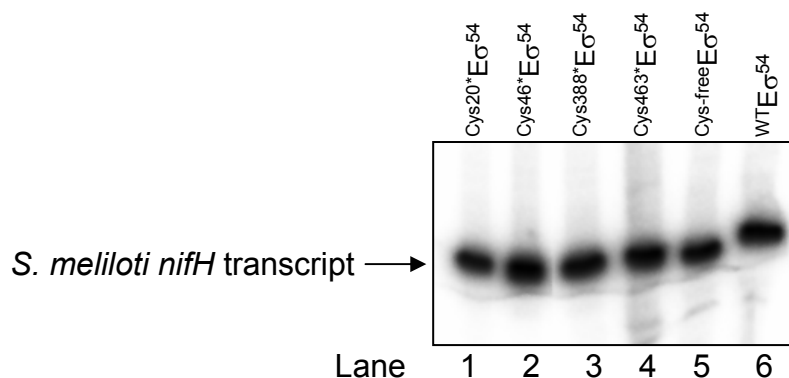

*In vitro* single-round transcription activity of RNAP reconstituted with the FeBABE modified  $\sigma^{54}$  variants. Assays (10 $\mu$ l reactions) were conducted from the *S. meliloti nifH* promoter on the supercoiled plasmid pMKC28. Mutant E $\sigma^{54}$  (100nM, reconstituted with 1:4 molar ratio of core RNAP to  $\sigma^{54}$ ) was incubated with 20nM pMKC28 in STA buffer (see Material and Methods) at 37°C for 5 minutes. Activator PspF<sub>1-275</sub> (5 $\mu$ M) and ATP (4mM) were added to initiate open complex formation. Following a further 5 minutes incubation at 37°C, transcript formation was initiated by adding 1mM ATP, CTP and GTP, 0.5mM UTP, 3  $\mu$ Ci of [ $\alpha$ -<sup>32</sup>P] UTP (20  $\mu$ Ci/ $\mu$ l), and 100  $\mu$ g/ml of heparin. Following a further 5 minutes incubation at 37°C, the reaction was stopped by adding 4 $\mu$ l of formamide-loading dye (3% w/v xylene, 3% w/v bromophenol blue and 800  $\mu$ l of 250 mM EDTA in 10 ml of deionised formamide). The reaction was heated at 90°C for 1 min and transferred to ice. Half (7 $\mu$ l) of the reaction is used for electrophoresis on a 6% w/v polyacrylamide-6 M urea gel. Following electrophoresis, the gel was dried and analyzed by PhosphorImager analysis. As shown above, all E $\sigma^{54}$  reconstituted with the  $\sigma^{54}$  variants (lanes 1-5) displayed 85-100% wild-type (lane 6) levels of transcription activity.
